# Supplementary material
Source: PubMed Central journal article supplement (PMC2615075)
Supplement: NIHMS42188-supplement-supplement_1.pdf [file NIHMS42188-supplement-supplement_1.pdf]

Supplemental Table 1

| Symbol      | Description                                                                                     | GeneID | Affy ID     | t       | adj.P.Val |
|-------------|-------------------------------------------------------------------------------------------------|--------|-------------|---------|-----------|
| VIM         | vimentin                                                                                        | 7431   | 201426_s_at | 9.3101  | 0.0002    |
| SLC9A3R1    | solute carrier family 9 (sodium/hydrogen exchanger), member 3 regulator 1                       | 9368   | 201349_at   | -7.9007 | 0.0011    |
| ERBB3       | v-erb-b2 erythroblastic leukemia viral oncogene homolog 3 (avian)                               | 2065   | 202454_s_at | -7.8099 | 0.0011    |
| EMP3        | epithelial membrane protein 3                                                                   | 2014   | 203729_at   | 7.7440  | 0.0011    |
| AXL         | AXL receptor tyrosine kinase                                                                    | 558    | 202686_s_at | 7.5355  | 0.0013    |
| TSPAN13     | tetraspanin 13                                                                                  | 27075  | 217979_at   | -7.2069 | 0.0022    |
| FOXA1       | forkhead box A1                                                                                 | 3169   | 204667_at   | -7.0119 | 0.0025    |
| MYO5C       | myosin VC                                                                                       | 55930  | 218966_at   | -6.9713 | 0.0025    |
| GRHL2       | grainyhead-like 2 (Drosophila)                                                                  | 79977  | 219388_at   | -6.9389 | 0.0025    |
| C10orf38    | chromosome 10 open reading frame 38                                                             | 221061 | 212771_at   | 6.6782  | 0.0039    |
| RAB25       | RAB25, member RAS oncogene family                                                               | 57111  | 218186_at   | -6.6161 | 0.0040    |
| INHBB       | inhibin, beta B (activin AB beta polypeptide)                                                   | 3625   | 205258_at   | -6.4502 | 0.0052    |
| PLEKHC1     | pleckstrin homology domain containing, family C (with FERM domain) member 1                     | 10979  | 214212_x_at | 6.3979  | 0.0054    |
| CYB561      | cytochrome b-561                                                                                | 1534   | 209164_s_at | -6.2666 | 0.0066    |
| RTN4        | reticulin 4                                                                                     | 57142  | 214629_x_at | 6.0491  | 0.0092    |
| PALM2-AKAP2 | PALM2-AKAP2 protein                                                                             | 445815 | 202759_s_at | 6.0124  | 0.0092    |
| FBXL11      | F-box and leucine-rich repeat protein 11                                                        | 22992  | 208989_s_at | -5.9791 | 0.0092    |
| PSMD1       | proteasome (prosome, macropain) 26S subunit, non-ATPase, 1                                      | 5707   | 201198_s_at | 5.9613  | 0.0092    |
| ARHGAP8     | Rho GTPase activating protein 8                                                                 | 23779  | 37117_at    | -5.9501 | 0.0092    |
| ELK3        | ELK3, ETS-domain protein (SRF accessory protein 2)                                              | 2004   | 221773_at   | 5.9429  | 0.0092    |
| STX2        | syntaxin 2                                                                                      | 2054   | 213434_at   | 5.9303  | 0.0092    |
| AGPAT5      | 1-acylglycerol-3-phosphate O-acyltransferase 5 (lysophosphatidic acid acyltransferase, epsilon) | 55326  | 218096_at   | 5.8348  | 0.0108    |
| TMEM30B     | transmembrane protein 30B                                                                       | 161291 | 213285_at   | -5.7961 | 0.0109    |
| SYDE1       | synapse defective 1, Rho GTPase, homolog 1 (C. elegans)                                         | 85360  | 44702_at    | 5.7900  | 0.0109    |
| TACSTD1     | tumor-associated calcium signal transducer 1                                                    | 4072   | 201839_s_at | -5.7607 | 0.0110    |
| GLIPR1      | GLI pathogenesis-related 1 (glioma)                                                             | 11010  | 204222_s_at | 5.7496  | 0.0110    |
| LLGL2       | lethal giant larvae homolog 2 (Drosophila)                                                      | 3993   | 203713_s_at | -5.7243 | 0.0110    |
| FXSD3       | FXSD domain containing ion transport regulator 3                                                | 5349   | 202489_s_at | -5.7176 | 0.0110    |
| RANBP9      | RAN binding protein 9                                                                           | 10048  | 216125_s_at | -5.6829 | 0.0112    |
| RAB32       | RAB32, member RAS oncogene family                                                               | 10981  | 204214_s_at | 5.6770  | 0.0112    |
| AGR2        | anterior gradient homolog 2 (Xenopus laevis)                                                    | 10551  | 209173_at   | -5.6162 | 0.0125    |
| KIAA0182    | KIAA0182                                                                                        | 23199  | 212057_at   | -5.5752 | 0.0130    |
| ZMYM6       | zinc finger, MYM-type 6                                                                         | 9204   | 213698_at   | 5.5696  | 0.0130    |
| PALM2-AKAP2 | PALM2-AKAP2 protein                                                                             | 445815 | 202760_s_at | 5.5440  | 0.0134    |
| RTN4        | reticulin 4                                                                                     | 57142  | 210968_s_at | 5.5141  | 0.0136    |
| MPP1        | membrane protein, palmitoylated 1, 55kDa                                                        | 4354   | 202974_at   | 5.5112  | 0.0136    |
| SGCB        | sarcoglycan, beta (43kDa dystrophin-associated glycoprotein)                                    | 6443   | 205120_s_at | 5.4951  | 0.0137    |
| RANBP5      | RAN binding protein 5                                                                           | 3843   | 211954_s_at | 5.4682  | 0.0142    |
| EMP2        | epithelial membrane protein 2                                                                   | 2013   | 204975_at   | -5.4365 | 0.0147    |
| TIMP1       | TIMP metalloproteinase inhibitor 1                                                              | 7076   | 201666_at   | 5.4265  | 0.0147    |
| GATA3       | GATA binding protein 3                                                                          | 2625   | 209604_s_at | -5.4163 | 0.0147    |
| PLOD3       | procollagen-lysine, 2-oxoglutarate 5-dioxygenase 3                                              | 8985   | 202185_at   | 5.4024  | 0.0147    |

Supplemental Table 1

|         |                                                                                                              |        |             |         |        |
|---------|--------------------------------------------------------------------------------------------------------------|--------|-------------|---------|--------|
| NHEJ1   | nonhomologous end-joining factor 1                                                                           | 79840  | 219418_at   | 5.3953  | 0.0147 |
| TGFBR2  | transforming growth factor, beta receptor II (70/80kDa)                                                      | 7048   | 208944_at   | 5.3639  | 0.0154 |
| KRR1    | KRR1, small subunit (SSU) processome component, homolog (yeast)                                              | 11103  | 214085_x_at | 5.3460  | 0.0154 |
| PROCR   | protein C receptor, endothelial (EPCR)                                                                       | 10544  | 203650_at   | 5.3450  | 0.0154 |
| SLC4A7  | solute carrier family 4, sodium bicarbonate cotransporter, member 7                                          | 9497   | 209884_s_at | 5.3087  | 0.0159 |
| TJP3    | tight junction protein 3 (zona occludens 3)                                                                  | 27134  | 35148_at    | -5.2960 | 0.0159 |
| RBM35B  | RNA binding motif protein 35B                                                                                | 80004  | 219395_at   | -5.2930 | 0.0159 |
| CTSC    | cathepsin C                                                                                                  | 1075   | 201487_at   | 5.2901  | 0.0159 |
| SPDEF   | SAM pointed domain containing ets transcription factor                                                       | 25803  | 220192_x_at | -5.2873 | 0.0159 |
| BLVRB   | biliverdin reductase B (flavin reductase (NADPH))                                                            | 645    | 202201_at   | -5.2777 | 0.0159 |
| ADNP    | activity-dependent neuroprotector                                                                            | 23394  | 201773_at   | -5.2525 | 0.0159 |
| TRPC1   | transient receptor potential cation channel, subfamily C, member 1                                           | 7220   | 205803_s_at | 5.2517  | 0.0159 |
| RBM35A  | RNA binding motif protein 35A                                                                                | 54845  | 219121_s_at | -5.2516 | 0.0159 |
| PRSS8   | protease, serine, 8                                                                                          | 5652   | 202525_at   | -5.2447 | 0.0159 |
| XPB1    | X-box binding protein 1                                                                                      | 7494   | 200670_at   | -5.2188 | 0.0166 |
| FOSL1   | FOS-like antigen 1                                                                                           | 8061   | 204420_at   | 5.2099  | 0.0166 |
| TOB1    | transducer of ERBB2, 1                                                                                       | 10140  | 202704_at   | -5.1548 | 0.0184 |
| HOOK2   | hook homolog 2 (Drosophila)                                                                                  | 29911  | 218780_at   | -5.1506 | 0.0184 |
| SOX13   | SRY (sex determining region Y)-box 13                                                                        | 9580   | 209736_at   | -5.1279 | 0.0186 |
| FN1     | fibronectin 1                                                                                                | 2335   | 211719_x_at | 5.1234  | 0.0186 |
| CD24    | CD24 molecule                                                                                                | 934    | 266_s_at    | -5.1222 | 0.0186 |
| NNMT    | nicotinamide N-methyltransferase                                                                             | 4837   | 202238_s_at | 5.1186  | 0.0186 |
| FBXL11  | F-box and leucine-rich repeat protein 11                                                                     | 22992  | 208988_at   | -5.1003 | 0.0188 |
| SLC20A1 | solute carrier family 20 (phosphate transporter), member 1                                                   | 6574   | 201920_at   | 5.0992  | 0.0188 |
| SULT1A1 | sulfotransferase family, cytosolic, 1A, phenol-preferring, member 1                                          | 6817   | 203615_x_at | -5.0798 | 0.0192 |
| PBX1    | pre-B-cell leukemia homeobox 1                                                                               | 5087   | 212151_at   | -5.0758 | 0.0192 |
| NT5E    | 5'-nucleotidase, ecto (CD73)                                                                                 | 4907   | 203939_at   | 5.0703  | 0.0192 |
| FAM117A | family with sequence similarity 117, member A                                                                | 81558  | 221249_s_at | -5.0580 | 0.0192 |
| RFTN1   | raftlin, lipid raft linker 1                                                                                 | 23180  | 212646_at   | 5.0571  | 0.0192 |
| DFNA5   | deafness, autosomal dominant 5                                                                               | 1687   | 203695_s_at | 5.0511  | 0.0192 |
| PLEKHC1 | pleckstrin homology domain containing, family C (with FERM domain) member 1                                  | 10979  | 209209_s_at | 5.0266  | 0.0195 |
| FN1     | fibronectin 1                                                                                                | 2335   | 210495_x_at | 5.0265  | 0.0195 |
| SULT1A1 | sulfotransferase family, cytosolic, 1A, phenol-preferring, member 1                                          | 6817   | 215299_x_at | -5.0213 | 0.0195 |
| ANPEP   | alanyl (membrane) aminopeptidase (aminopeptidase N, aminopeptidase M, microsomal aminopeptidase, CD13, p150) | 290    | 202888_s_at | 5.0207  | 0.0195 |
| TFAP2A  | transcription factor AP-2 alpha (activating enhancer binding protein 2 alpha)                                | 7020   | 204654_s_at | -4.9964 | 0.0200 |
| PRR5    | proline rich 5 (renal)                                                                                       | 55615  | 205980_s_at | -4.9928 | 0.0200 |
| SACS    | spastic ataxia of Charlevoix-Saguenay (sacsin)                                                               | 26278  | 213262_at   | 4.9899  | 0.0200 |
| RBM13   | RNA binding motif protein 13                                                                                 | 84549  | 211686_s_at | 4.9879  | 0.0200 |
| FAM102A | family with sequence similarity 102, member A                                                                | 399665 | 212400_at   | -4.9837 | 0.0200 |
| DAAM1   | dishevelled associated activator of morphogenesis 1                                                          | 23002  | 216060_s_at | -4.9760 | 0.0200 |
| TPD52L1 | tumor protein D52-like 1                                                                                     | 7164   | 210372_s_at | -4.9728 | 0.0200 |
